# Supplementary material for: Water- and alcohol-soluble cationic phenanthroline derivatives as efficient cathode interfacial layers for bulk-heterojunction polymer solar cells
Source: Royal Society of Chemistry journal article supplement (doi:10.1039/c7tc00788d), 2017-01-01
Supplement: c7tc00788d1.pdf [file c7tc00788d1.pdf]

**Supporting Information**

**Water- and Alcohol-Soluble Cationic Phenanthroline  
Derivatives as Efficient Cathode Interfacial Layers  
for Bulk-Heterojunction Polymer Solar Cells**

*Bin Zhang,<sup>a</sup> Shuwang Yi,<sup>b</sup> Guiting Chen,<sup>b</sup> Zhicai He,<sup>b\*</sup> Hong-Bin Wu,<sup>b</sup> Wei Yang,<sup>b</sup>  
Fangfang Niu,<sup>a</sup> Junle Qu,<sup>a</sup> Pengju Zeng,<sup>a\*</sup> Yong Cao<sup>b</sup>*

<sup>a</sup>Key Laboratory of Optoelectronic Devices and Systems of Ministry of Education and Guangdong Province, College of Optoelectronic Engineering, Shenzhen University, Shenzhen 518060, China.

\*E-mail: zengpj@szu.edu.cn

<sup>b</sup>Institute of Polymer Optoelectronic Materials and Devices, State Key Laboratory of Luminescent Materials and Devices, South China University of Technology, Guangzhou 510640, China. E-mail:

zhicaihe@scut.edu.cn

# Supplementary Figures

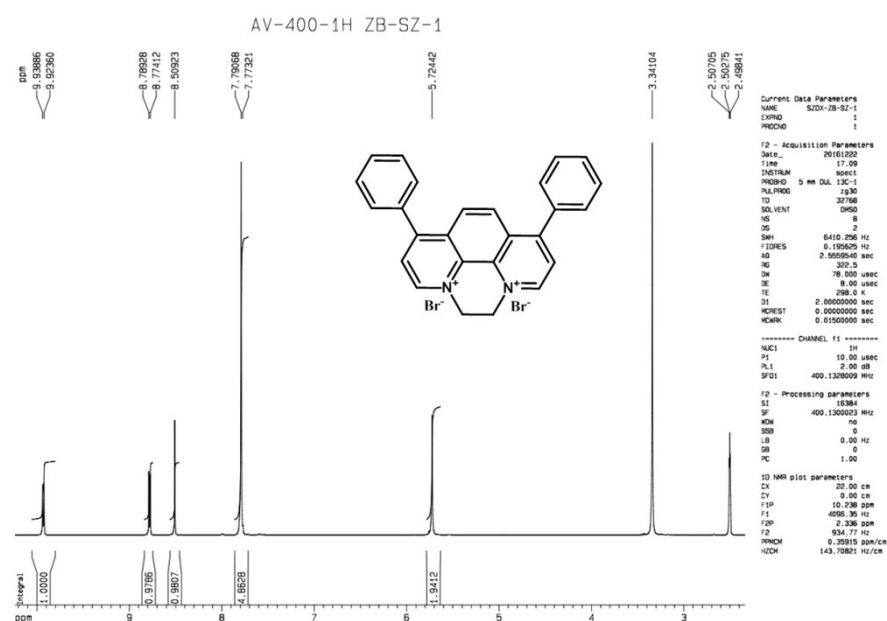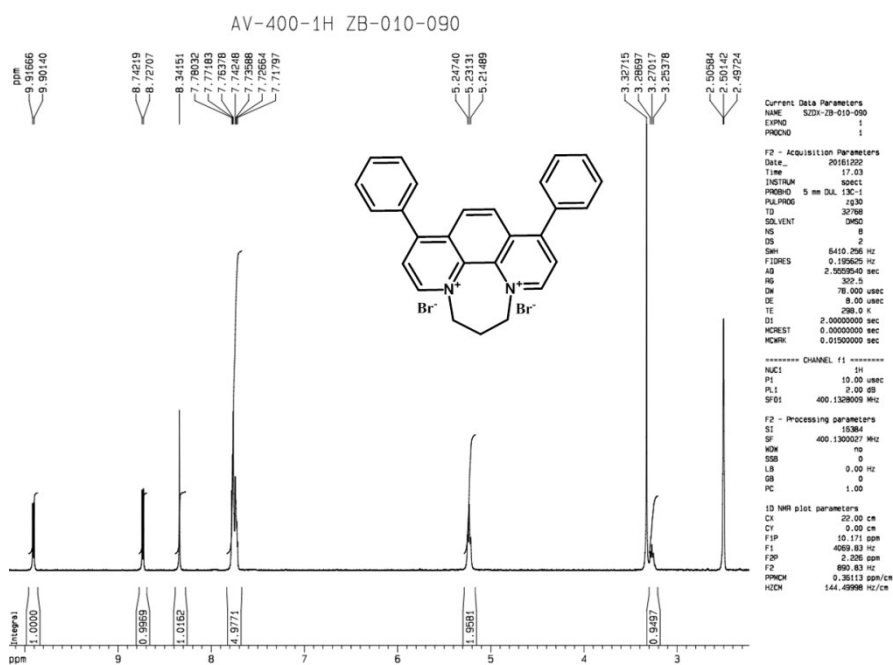

Figure S1. The <sup>1</sup>H NMR spectra of Bphen-Et and Bphen-Pr

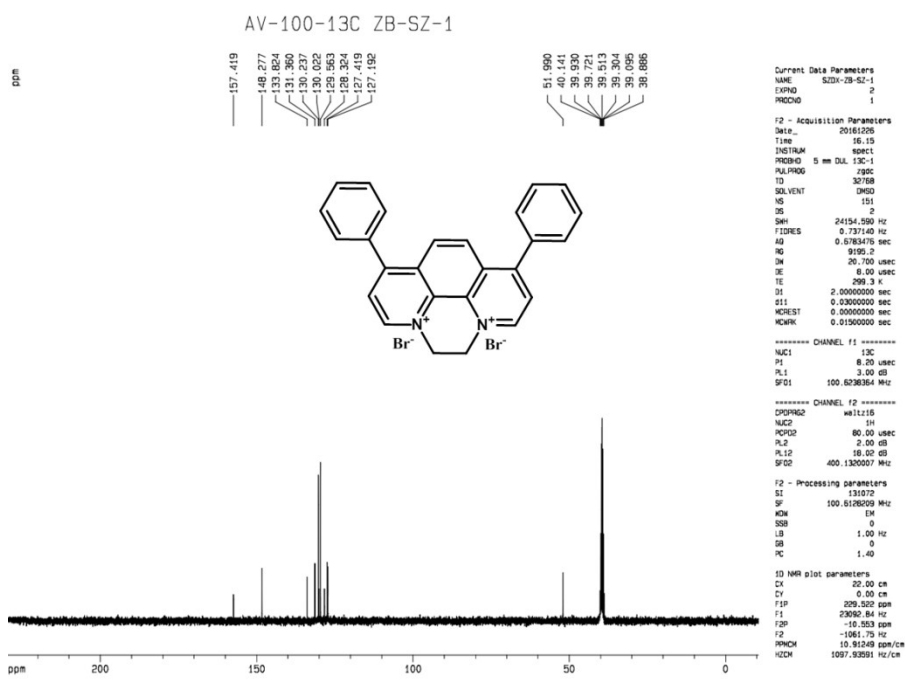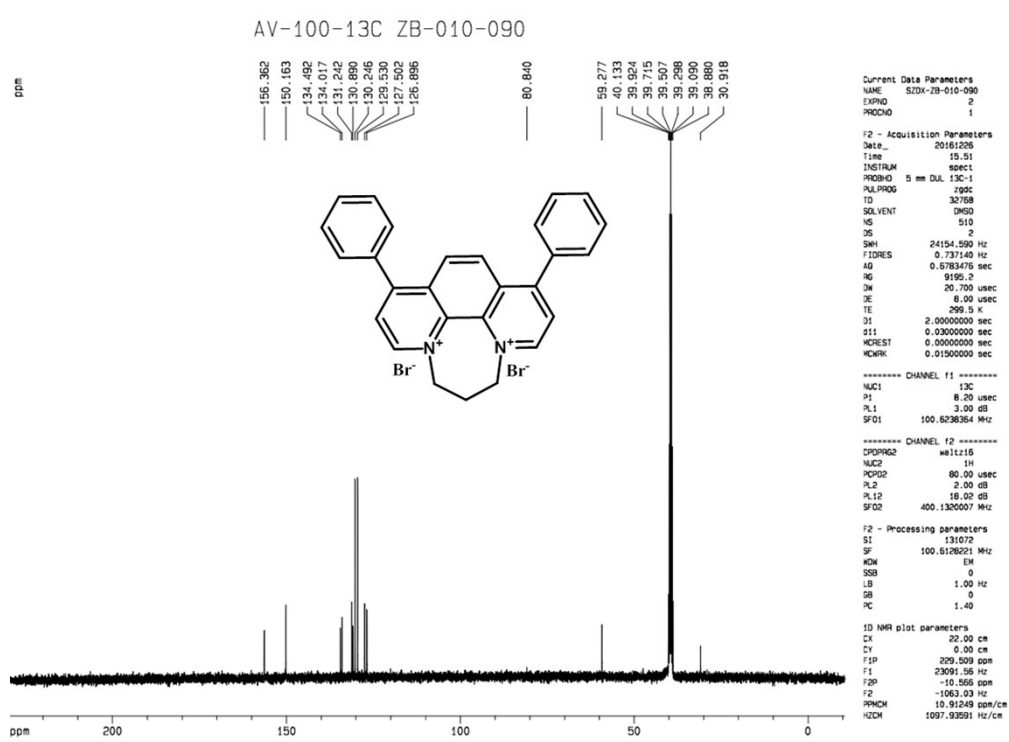

Figure S2. The <sup>13</sup>C NMR spectra of Bphen-Et and Bphen-Pr

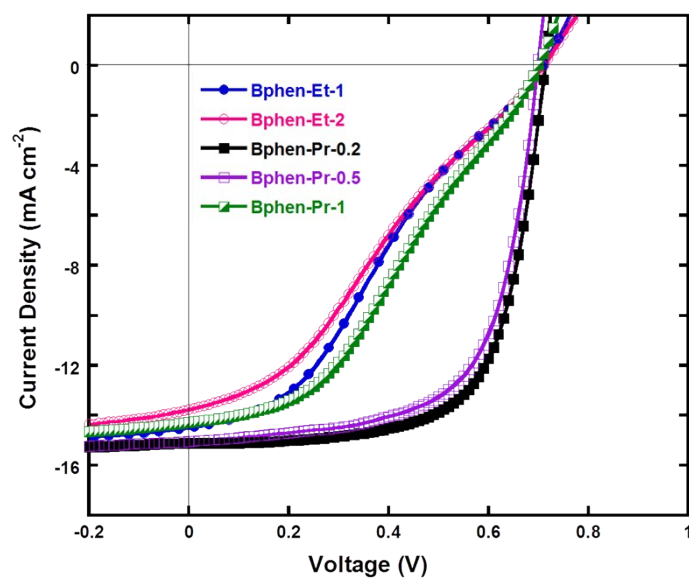

**Figure S3.**  $J$ - $V$  characteristics of Bphen-Et and Bphen-Pr CILs with different solution concentration

**Table S1.** Photovoltaic performance of Bphen-Et and Bphen-Pr CILs with different solution concentration

| CILs (mg/ml)   | Voc (V) | Jsc (mA/cm <sup>2</sup> ) | FF (%) | PCE (%) |
|----------------|---------|---------------------------|--------|---------|
| Bphen-Et (1)   | 0.71    | 14.50                     | 31.11  | 3.20    |
| Bphen-Et (2)   | 0.71    | 13.77                     | 29.92  | 2.93    |
| Bphen-Pr (0.2) | 0.71    | 15.12                     | 67.68  | 7.27    |
| Bphen-Pr (0.5) | 0.71    | 15.04                     | 64.88  | 6.93    |
| Bphen-Pr (1)   | 0.71    | 14.28                     | 36.52  | 3.70    |
